# Supplementary material
Source: PubMed Central journal article supplement (PMC7552982)
Supplement: mmc1.pdf [file mmc1.pdf]

**Cell Systems, Volume 11**

**Supplemental Information**

**A Sweep of Earth's Virome Reveals Host-Guided  
Viral Protein Structural Mimicry and Points  
to Determinants of Human Disease**

**Gorka Lasso, Barry Honig, and Sagi D. Shapira**

Figure S1

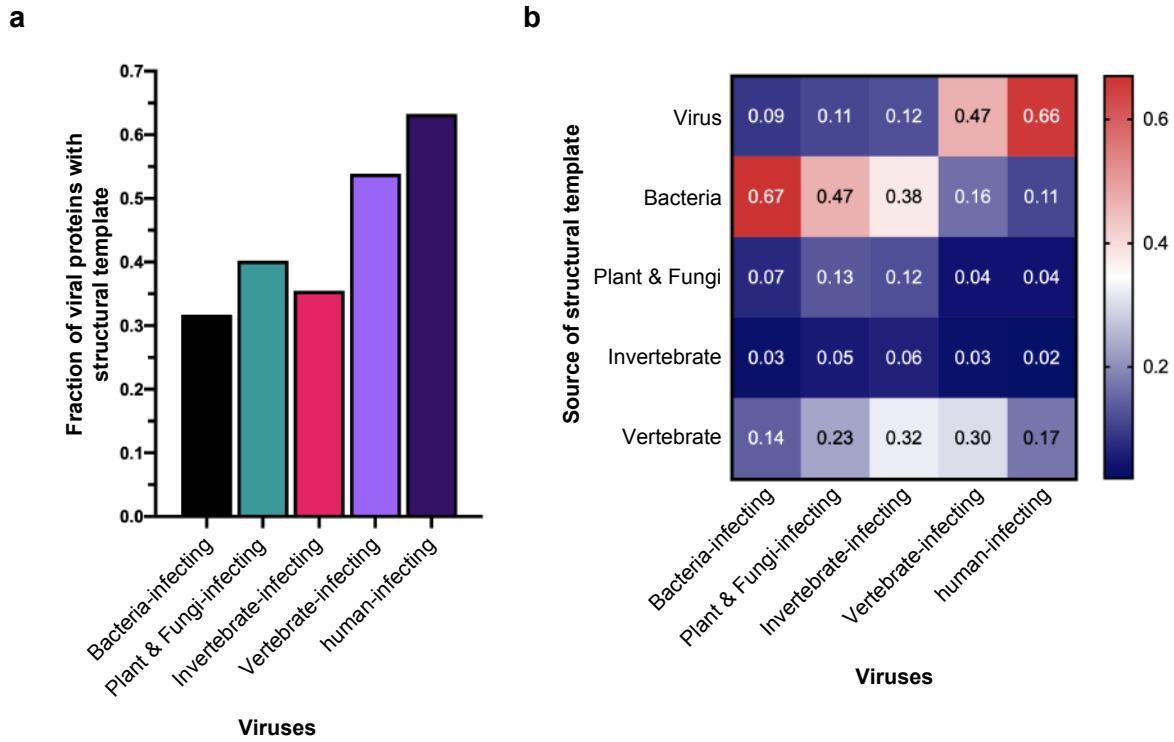

**Figure S1I Structural coverage of viral proteins.** a, Fraction of viral proteins, grouped based on the taxonomic division of the corresponding host, with a sequence homolog whose structure is experimentally known (structural template). b, Fraction of the structural templates belonging to a particular taxonomic division identified for different groups of viruses.

## Figure S2

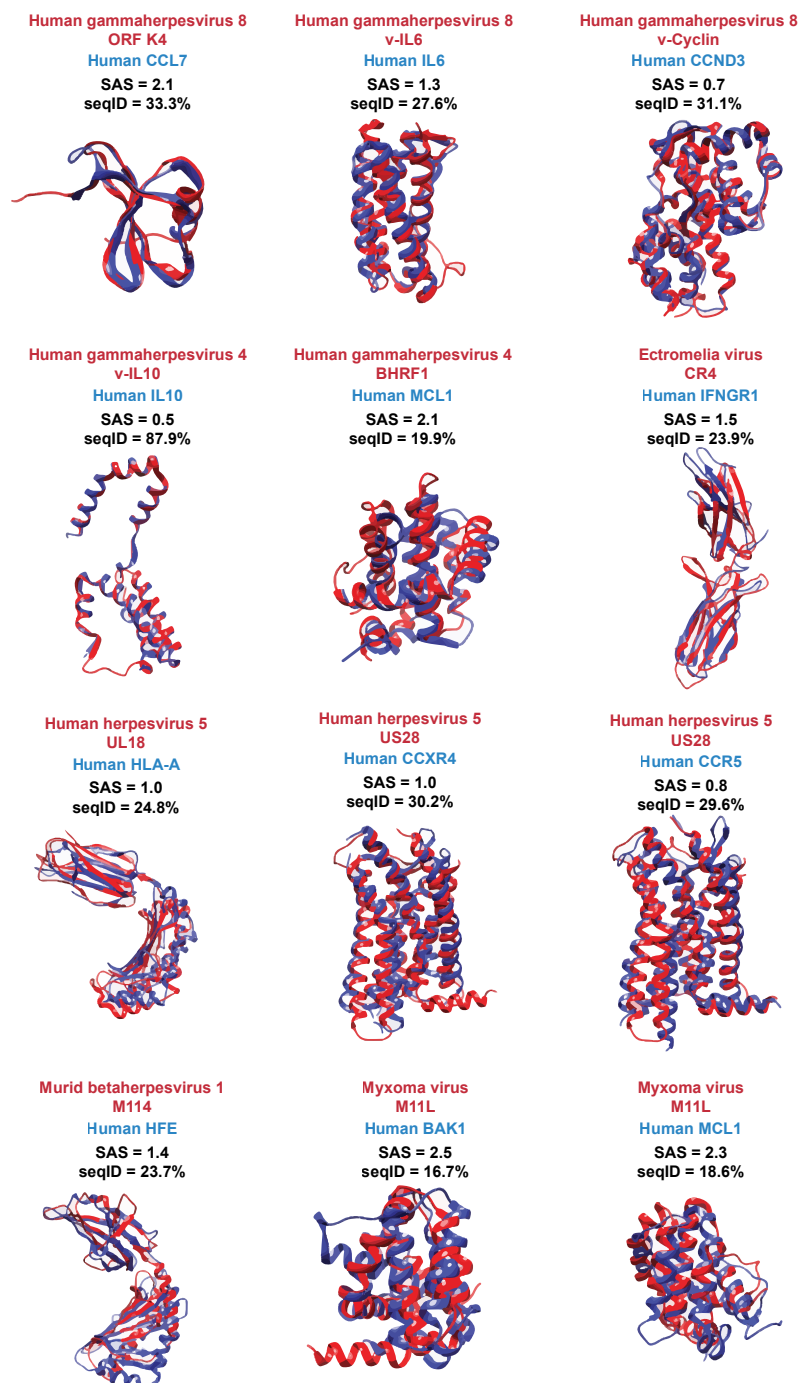

**Figure S2| Virome-wide scan rediscovers known viral-host structural mimics.** Shown are examples of known viral-host structural mimics (Fernandez et al., 2000, Franzosa and Xia, 2011, Elde and Malik, 2009, Li et al., 1997, Kvensakul et al., 2007, Burg et al., 2015) recapitulated with structural neighbor search. Viral and host proteins are colored in red and blue respectively. SAS is shown in black.
